# Supplementary material for: The value of imaging and clinical outcomes in a phase II clinical trial of a lysophosphatidic acid receptor antagonist in idiopathic pulmonary fibrosis
Source: PubMed Central journal article supplement — Ther Adv Respir Dis. 2021 Mar 29;15:17534666211004238. doi: 10.1177/17534666211004238 (PMC8013716; doi:10.1177/17534666211004238), 2021-03-29
Supplement: sj-pdf-3-tar-10.1177_17534666211004238.pdf [file sj-pdf-3-tar-10.1177_17534666211004238.pdf]

Reviewer 2 v.1

Comments to the Author

A very nicely formulated study. I would add to the limitations part that this is an analysis of data of pre-existing study thus all the limitations, biases and confounders will be naturally part of this new one. Second, you described in detail certain radiological parameters and their significance as stand alone or in summation , it worth while looking in other possible significance in variables such as QILD/QLF for example , as those might be more significant as biologically IPF does not behave as a simple add or subtract formula.
